# Supplementary material for: Ce Lab, a microfluidic platform for the study of life history traits, reveals metformin and SGK-1 regulation of longevity and reproductive span
Source: Royal Society of Chemistry journal article supplement (doi:10.1039/d3lc00028a), 2023-01-01
Supplement: d3lc00028a1.pdf [file d3lc00028a1.pdf]

| Reference                                                   | Assay/Ability                               | Worms per Unit | # of Units | Advantages                                                                           | Limitations                                                                        |
|-------------------------------------------------------------|---------------------------------------------|----------------|------------|--------------------------------------------------------------------------------------|------------------------------------------------------------------------------------|
| <b>Le, et al. (2020)</b><br><b>HeALTH</b>                   | LS (DR)                                     | 1              | 60         | - Multiple chips are monitored simultaneously on linear stage                        | - No pillars in chambers<br>- Complicated to load worms<br>- Difficult to operate  |
| <b>Rahman, et al. (2020)</b><br><b>NemaLife</b>             | LS (DR); Motility;<br>Food intake           | 15             | 9          | - Intermittent fluid flow<br>- Tests multiple populations                            | - No individual tracking<br>- Limited capacity                                     |
| <b>Banse, et al. (2019)</b><br><b>Stress-Chip</b>           | LS (DR); Oxidative<br>and osmotic stress    | 1              | 100        | - Automated survival scoring                                                         | - Complicated to load worms<br>- Prone to clogging<br>- One population per chip    |
| <b>Letizia, et al. (2018)</b>                               | Developmental rate                          | 1              | 16         | - Great tool for embryonic and post-embryonic studies                                | - Application specific<br>- Limited capacity<br>- One population per chip          |
| <b>Mondal, et al. (2016)</b>                                | High-throughput<br>imaging                  | 40             | 96         | - High-resolution and high-speed image acquisition<br>- Tests multiple populations   | - Application specific                                                             |
| <b>Li, et al. (2015)</b>                                    | RS; Brood size                              | 1              | 16         | - Automated RS and brood size scoring                                                | - Application specific<br>- Complicated to load animals<br>- Small number of worms |
| <b>Xian, et al. (2013)</b><br><b>WormFarm</b>               | LS (DR)                                     | 40             | 8          | - Automated survival, body size and motility scoring<br>- Tests multiple populations | - No pillars in chambers<br>- Difficult to operate<br>- No individual tracking     |
| <b>Albrecht, et al. (2011)</b>                              | Chemosensory<br>behaviors                   | 25             | 1          | - Great tool for chemosensory stimulus studies                                       | - Application specific                                                             |
| <b>Churgin, et al. (2017)</b><br><b>WormMotel</b>           | LS; Motility                                | 1              | 240        | - Automated survival and motility analysis of individual worms                       | - No progeny removal mechanism<br>- Laborious to fabricate                         |
| <b>Pincus, et al. (2011)</b>                                | LS; Motility;<br>High-throughput<br>imaging | 1              | 100        | - Enables long-term tracking of individual worms                                     | - No progeny removal mechanism<br>- No mid-life manipulation                       |
| <b>Stroustrup, et al. (2013)</b><br><b>Lifespan Machine</b> | LS                                          | 35             | 10×16      | - Automated data acquisition and processing                                          | - No progeny removal mechanism<br>- No individual tracking                         |
| <b>Kerr, et al. (2022)</b><br><b>C. elegans Observatory</b> | LS; Body size;<br>Motility                  | 40-60          | 64×9       | - Automated data acquisition and processing                                          | - No progeny removal mechanism<br>- No individual tracking                         |

**Table S1**

Table A in S2.

| Fig. | Assay  | Test Condition                    | Comparison       | Rep # | Mean        | % Change | p-value      | n       |
|------|--------|-----------------------------------|------------------|-------|-------------|----------|--------------|---------|
| 2a   | LS     | N2, Unmated, Live OP50, Chip      | repB/repA        | NA    | 13.46/13.63 | -1.24    | 0.2074, n.s. | 80/99   |
|      |        |                                   | repC/repA        | NA    | 13.04/13.63 | -4.32    | 0.1187, n.s. | 100/99  |
|      |        |                                   | repD/repA        | NA    | 14.27/13.63 | +4.48    | 0.0587, n.s. | 66/99   |
| 2b   | LS     | N2, Unmated, Live OP50, Chip      | 15°C/20°C        | 1     | 19.81/12.19 | +62.51   | <0.0001      | 66/66   |
|      |        |                                   | 25°C/20°C        | 1     | 7.25/12.19  | -40.52   | <0.0001      | 66/66   |
| 2c   | LS     | N2, Unmated, Live OP50            | Chip/Plate       | 1     | 16.28/16.70 | -2.51    | 0.253, n.s.  | 66/80   |
|      |        | <i>eat-2</i> , Unmated, Live OP50 |                  | 1     | 22.24/22.97 | -3.17    | 0.135, n.s.  | 66/80   |
|      |        | Unmated, Live OP50, Chip          | <i>eat-2</i> /N2 | 1     | 22.24/16.28 | +36.60   | <0.0001      | 66/66   |
| 2d   | LS     | N2, Live OP50, Chip               | Mated/Unmated    | 1     | 13.33/16.28 | -18.12   | 0.0003       | 62/66   |
|      |        |                                   |                  | 2     | 13.08/14.35 | -8.85    | 0.0006       | 67/66   |
|      |        |                                   |                  | 3     | 11.77/13.04 | -9.22    | <0.0001      | 100/100 |
| 2e   | RS     | N2, Live OP50, Chip               | Mated/Unmated    | 1     | 7.56/5.51   | +37.20   | <0.0001      | 100/101 |
|      |        |                                   |                  | 2     | 9.51/5.87   | +62.01   | <0.0001      | 67/66   |
|      |        |                                   |                  | 3     | 7.93/5.84   | +35.78   | <0.0001      | 98/99   |
| 2f   | PP     | N2, Chip                          | Mated/Unmated    | 1     | NA          | NA       | NA           | 51/51   |
| 2g   | LS     | N2, Unmated, HK OP50              | UA/Control       | 1     | 13.40/11.74 | +14.14   | 0.0001       | 100/100 |
| 2h   | RS     | N2, Mated, HK OP50                | UA/Control       | 1     | 7.30/6.27   | +16.34   | 0.0036       | 100/100 |
|      |        |                                   |                  | 2     | 7.68/6.97   | +10.18   | 0.0006       | 100/100 |
| 2i   | LS     | N2, Unmated, HK OP50              | Met/Control      | 1     | 13.97/11.74 | +19.00   | <0.0001      | 100/100 |
|      |        |                                   |                  | 2     | 14.30/12.82 | +11.54   | <0.0001      | 100/100 |
| 2j   | RS     | N2, Mated, HK OP50                | Met/Control      | 1     | 7.40/6.27   | +17.90   | 0.0026       | 100/100 |
|      |        |                                   |                  | 2     | 12.22/10.67 | +14.52   | 0.0002       | 99/95   |
| 3c   | RS     | Mated, Live OP50, Plate           | <i>daf-2</i> /N2 | 1     | 12.74/9.87  | +29.07   | <0.0001      | 106/89  |
| 3d   | RS     | Mated, Live OP50, Chip            | <i>daf-2</i> /N2 | 1     | 13.15/7.10  | +85.20   | <0.0001      | 196/100 |
| 5a   | RS     | N2, Mated, Plate                  | HK/Live OP50     | 1     | NA/9.87     | NA       | NA           | 100/89  |
| 5c   | LS     | N2, Unmated, Chip                 | HK/Live OP50     | 1     | 14.20/13.46 | +5.49    | 0.0003       | 80/80   |
|      |        |                                   |                  | 2     | 14.18/14.35 | -1.18    | 0.7757, n.s. | 50/66   |
|      |        |                                   |                  | 3     | 15.99/14.52 | +10.12   | <0.0001      | 50/40   |
| 5e   | LS     | N2, Mated, Chip                   | HK/Live OP50     | 1     | 15.25/12.83 | +18.86   | <0.0001      | 50/50   |
|      |        |                                   |                  | 2     | 16.54/13.08 | +26.45   | <0.0001      | 50/67   |
|      |        |                                   |                  | 3     | 15.87/13.41 | +18.34   | <0.0001      | 50/40   |
| 5f   | RS     | N2, Mated, Chip                   | HK/Live OP50     | 1     | 11.18/8.53  | +31.06   | <0.0001      | 50/50   |
|      |        |                                   |                  | 2     | 11.95/8.86  | +34.87   | <0.0001      | 50/40   |
|      |        |                                   |                  | 3     | 12.30/9.51  | +29.33   | <0.0001      | 50/67   |
| 5h   | Length | N2, Mated, Chip                   | HK/Live OP50     | 1     | 1.25/1.46   | -14.38   | <0.0001      | 20/19   |
|      |        |                                   |                  | 2     | 1.29/1.48   | -12.83   | <0.0001      | 25/25   |
|      |        |                                   |                  | 3     | 1.31/1.49   | -12.08   | <0.0001      | 30/33   |
| 5i   | Width  | N2, Mated, Chip                   | HK/Live OP50     | 1     | 61.47/67.76 | -9.28    | 0.0002       | 20/20   |
|      |        |                                   |                  | 2     | 62.38/70.84 | -11.94   | <0.0001      | 25/25   |
|      |        |                                   |                  | 3     | 61.84/66.59 | -7.13    | 0.0001       | 30/33   |
| 5j   | LS     | <i>glp-1</i> , Mated, Chip        | HK/Live OP50     | 1     | 9.69/9.02   | +7.42    | 0.3424, n.s. | 50/40   |
|      |        |                                   |                  | 2     | 9.74/9.39   | +3.72    | 0.4001, n.s. | 50/50   |
| 5k   | Length | <i>glp-1</i> , Mated, Chip        | HK/Live OP50     | 1     | 1.46/1.51   | -3.31    | 0.1840, n.s. | 24/25   |
| 6a   | RS     | <i>eat-2</i> , Mated, Chip        | HK/Live OP50     | 1     | 14.46/13.54 | +6.79    | 0.0418       | 50/50   |
| 6c   | LS     | <i>skn-1</i> , Mated, Chip        | HK/Live OP50     | 1     | 13.16/10.97 | +19.96   | <0.0001      | 62/59   |
|      |        |                                   |                  | 2     | 12.60/11.33 | +11.20   | <0.0001      | 50/40   |
| 6d   | RS     | <i>skn-1</i> , Mated, Chip        | HK/Live OP50     | 1     | 9.37/7.67   | +22.16   | 0.0005       | 62/59   |
|      |        |                                   |                  | 2     | 10.32/8.23  | +25.39   | 0.0016       | 42/37   |
| 6e   | Length | <i>skn-1</i> , Mated, Chip        | HK/Live OP50     | 1     | 1.37/1.56   | -13.86   | <0.0001      | 19/19   |
|      |        |                                   |                  | 2     | 1.41/1.55   | -9.03    | <0.0001      | 25/25   |

|      |        |                                |                 |                  |             |             |              |              |        |
|------|--------|--------------------------------|-----------------|------------------|-------------|-------------|--------------|--------------|--------|
| 6f   | LS     | <i>daf-16</i> , Mated, Chip    | HK/Live OP50    | 1                | 11.17/9.92  | +12.60      | 0.0041       | 50/50        |        |
|      |        |                                |                 | 2                | 12.48/10.86 | +14.91      | 0.0002       | 50/50        |        |
| 6g   | RS     | <i>daf-16</i> , Mated, Chip    | HK/Live OP50    | 1                | 10.79/8.16  | +32.23      | <0.0001      | 50/50        |        |
|      |        |                                |                 | 2                | 12.04/9.24  | +30.30      | 0.0012       | 50/50        |        |
| 6h   | Length | <i>daf-16</i> , Mated, Chip    | HK/Live OP50    | 1                | 1.22/1.50   | -18.66      | <0.0001      | 21/20        |        |
| 6i   | LS     | <i>sgk-1</i> , Mated, Chip     | HK/Live OP50    | 1                | 18.43/18.05 | +2.10       | 0.7529, n.s. | 40/40        |        |
|      |        |                                |                 | 2                | 15.36/15.00 | +2.40       | 0.8382, n.s. | 50/50        |        |
| 6j   | RS     | <i>sgk-1</i> , Mated, Chip     | HK/Live OP50    | 1                | 15.56/15.81 | -1.58       | 0.7146, n.s. | 40/40        |        |
|      |        |                                |                 | 2                | 15.76/14.95 | +5.34       | 0.3483, n.s. | 50/50        |        |
| 6k   | Length | <i>sgk-1</i> , Mated, Chip     | HK/Live OP50    | 1                | 0.91/0.96   | -4.30       | 0.0103       | 20/20        |        |
| 7a   | LS     | Mated, Live OP50, Chip         |                 | <i>sgk-1/N2</i>  | 1           | 18.05/12.83 | +40.68       | <0.0001      | 40/50  |
|      |        |                                |                 | <i>daf-16/N2</i> | 1           | 10.86/12.83 | -15.35       | <0.0001      | 50/50  |
|      |        |                                |                 | <i>skn-1/N2</i>  | 1           | 10.61/12.83 | -17.30       | <0.0001      | 70/50  |
|      |        |                                |                 |                  | 2           | 11.33/13.44 | -15.69       | <0.0001      | 40/40  |
| 7b   | RS     | Mated, Live OP50, Chip         |                 | <i>sgk-1/N2</i>  | 1           | 15.81/8.53  | +85.34       | <0.0001      | 40/50  |
|      |        |                                |                 | <i>daf-16/N2</i> | 1           | 9.24/8.53   | +8.32        | 0.0530, n.s. | 50/50  |
|      |        |                                |                 | <i>skn-1/N2</i>  | 1           | 6.91/8.53   | -18.99       | 0.0078       | 70/50  |
| 7f   | RS/LS  | Unmated, Live OP50, Chip       |                 | <i>daf-16/N2</i> | NA          | 0.54/0.41   | +31.70       | <0.0001      | 41/147 |
|      |        |                                |                 | <i>skn-1/N2</i>  | NA          | 0.48/0.41   | +17.07       | 0.0005       | 28/147 |
|      |        |                                |                 | <i>sgk-1/N2</i>  | NA          | 0.77/0.41   | +87.80       | <0.0001      | 43/147 |
|      |        | Mated, Live OP50, Chip         |                 | <i>sgk-1/N2</i>  | NA          | 0.78/0.66   | +18.18       | <0.0001      | 26/126 |
|      |        | <i>sgk-1</i> , Live OP50, Chip | Mated/Unmated   | NA               | 0.78/0.77   | +1.29       | 0.7899, n.s. | 26/43        |        |
| 7g   | LS     | N2, Live OP50, Chip            | Mated/Unmated   | 1                | 13.08/14.35 | -8.85       | 0.0006       | 67/66        |        |
|      |        |                                |                 | 2                | 11.77/13.04 | -9.22       | <0.0001      | 100/100      |        |
|      |        | <i>sgk-1</i> , Live OP50, Chip | Mated/Unmated   | 1                | 15.01/14.09 | +6.5        | 0.0003       | 50/50        |        |
| S.1e | RS     | N2, Mated, Live OP50, Chip     |                 | repB/repA        | NA          | 8.53/8.27   | +3.14        | 0.2334, n.s. | 50/100 |
|      |        |                                |                 | repC/repA        | NA          | 7.93/8.27   | -4.11        | 0.2009, n.s. | 99/100 |
|      |        |                                |                 | repD/repA        | NA          | 8.86/8.27   | +7.13        | 0.0610, n.s. | 40/100 |
| S.1f | Length | N2, Live OP50, Chip            | Mated/Unmated   | 1                | 1.47/1.50   | -2.00       | 0.3953, n.s. | 20/20        |        |
|      |        |                                |                 | 2                | 1.48/1.45   | +2.06       | 0.2125, n.s. | 25/25        |        |
|      |        |                                |                 | 3                | 1.49/1.51   | -1.32       | 0.5625, n.s. | 33/30        |        |
| S.1g | LS     | N2, Unmated, HK OP50           | NMN/Control     | 1                | 11.74/11.74 | +0.02       | 0.3482, n.s. | 100/100      |        |
| S.1h | RS     | N2, Mated, HK OP50             | NMN/Control     | 1                | 6.4/6.27    | +1.95       | 0.7553, n.s. | 100/100      |        |
|      |        |                                |                 | 2                | 8.14/7.27   | +11.96      | 0.9022, n.s. | 100/100      |        |
| S.1i | LS     | N2, Unmated, HK OP50           | NAC/Control     | 1                | 12.72/11.74 | +8.34       | 0.0148       | 100/100      |        |
| S.1j | RS     | N2, Mated, HK OP50             | NAC/Control     | 1                | 6.81/6.27   | +8.49       | 0.1998, n.s. | 100/100      |        |
|      |        |                                |                 | 2                | 6.24/6.10   | +2.29       | 0.508, n.s.  | 85/77        |        |
| S.3a | RS     | N2, Unmated, Chip              | HK/Live OP50    | 1                | 5.70/5.39   | +5.75       | 0.0037       | 80/80        |        |
|      |        |                                |                 | 2                | 6.23/5.87   | +6.13       | 0.0112       | 50/40        |        |
| S.3b | Length | N2, Unmated, Chip              | HK/Live OP50    | 1                | 1.26/1.50   | -16         | <0.0001      | 21/20        |        |
|      |        |                                |                 | 2                | 1.28/1.45   | -11.72      | <0.0001      | 25/25        |        |
|      |        |                                |                 | 3                | 1.31/1.51   | -13.24      | <0.0001      | 30/31        |        |
| S.3c | Width  | N2, Unmated, Chip              | HK/Live OP50    | 1                | 61.12/71.23 | -14.19      | <0.0001      | 21/20        |        |
|      |        |                                |                 | 2                | 62.77/67.44 | -6.92       | 0.0005       | 25/25        |        |
|      |        |                                |                 | 3                | 58.46/67.73 | -13.68      | <0.0001      | 30/31        |        |
| S.3d | Length | Unmated, Live Op50, Chip       | <i>sgk-1/N2</i> | 1                | 0.97/1.50   | -35.33      | <0.0001      | 25/20        |        |

**Table B in S2.**

| Fig. | Test Condition                    | Comparison   | Experiments | n       | Mean        | % Change | P-value |
|------|-----------------------------------|--------------|-------------|---------|-------------|----------|---------|
| 3a   | N2, Mated, Live OP50              | Chip/Plate   | 11/7        | 852/519 | 10.86/78.69 | -86.19   | <0.0001 |
| 3b   | N2, Unmated, Live OP50            | Chip/Plate   | 1           | 100/89  | NA          | NA       | <0.0001 |
|      | <i>daf-2</i> , Unmated, Live OP50 | Chip/Plate   | 1           | 196/106 | NA          | NA       | <0.0001 |
| 5b   | N2, Mated, HK OP50                | Chip/Plate   | 1           | 89/100  | NA          | NA       | <0.0001 |
| 6b   | <i>eat-2</i> , Mated, Chip        | HK/Live OP50 | 1           | 50/50   | NA          | NA       | 0.0125  |

**Table C in S2.**

| Fig. | Correlation | Panel Condition          | Test Condition | n   | Experiments | r-value | p-value      |
|------|-------------|--------------------------|----------------|-----|-------------|---------|--------------|
| 4a   | LS-Length   | Unmated, Live OP50, Chip | N2             | 132 | 3           | +0.01   | 0.9313, n.s. |
|      |             |                          | <i>glp-1</i>   | 53  | 2           | -0.33   | 0.0165       |
|      |             |                          | <i>daf-2</i>   | 37  | 1           | +0.38   | 0.0224       |
| 4b   | LS-Width    | Unmated, Live OP50, Chip | N2             | 132 | 3           | -0.18   | 0.0447       |
|      |             |                          | <i>glp-1</i>   | 53  | 2           | -0.29   | 0.0372       |
|      |             |                          | <i>daf-2</i>   | 37  | 1           | -0.01   | 0.9424, n.s. |
| 4c   | RS-Length   | N2, Live OP50, Chip      | Unmated        | 132 | 3           | +0.03   | 0.7241, n.s. |
|      |             |                          | Mated          | 60  | 2           | -0.29   | 0.0246       |
| 4d   | LS-RS       | N2, Live OP50, Chip      | Unmated        | 147 | 3           | +0.02   | 0.7596, n.s. |
|      |             |                          | Mated          | 126 | 3           | +0.09   | 0.3152, n.s. |
| 4e   | LS-PP       | N2, Live OP50, Chip      | Unmated        | 34  | 1           | +0.363  | 0.0346       |
|      |             |                          | Mated          | 34  | 1           | +0.149  | 0.4003, n.s. |
| 4f   | RS-PP       | N2, Live OP50, Chip      | Unmated        | 50  | 1           | +0.543  | <0.0001      |
|      |             |                          | Mated          | 49  | 1           | +0.917  | <0.0001      |
| 5d   | LS-RS       | N2, Unmated, Chip        | Live OP50      | 147 | 3           | +0.02   | 0.7596, n.s. |
|      |             |                          | HK OP50        | 168 | 3           | -0.06   | 0.4406, n.s. |
| 5g   | LS-RS       | N2, Mated, Chip          | Live OP50      | 126 | 3           | +0.09   | 0.3152, n.s. |
|      |             |                          | HK OP50        | 132 | 3           | +0.25   | 0.0045       |
| 7c   | LS-RS       | Unmated, Live OP50, Chip | <i>sgk-1</i>   | 43  | 1           | +0.49   | 0.0008       |
|      |             |                          | N2             | 147 | 3           | +0.02   | 0.7596, n.s. |
|      |             |                          | <i>skn-1</i>   | 28  | 1           | -0.06   | 0.7432, n.s. |
|      |             |                          | <i>daf-16</i>  | 41  | 1           | -0.26   | 0.0901, n.s. |
| 7d   | LS-RS       | Mated, Live OP50, Chip   | <i>sgk-1</i>   | 26  | 2           | +0.64   | 0.0004       |
|      |             |                          | N2             | 126 | 3           | +0.09   | 0.3152, n.s. |
|      |             |                          | <i>skn-1</i>   | 104 | 3           | +0.50   | <0.0001      |
|      |             |                          | <i>daf-16</i>  | 48  | 2           | +0.55   | <0.0001      |

**Table S2**
