# Supplementary figures and images for: Ce Lab, a microfluidic platform for the study of life history traits, reveals metformin and SGK-1 regulation of longevity and reproductive span
Source: Royal Society of Chemistry journal article supplement (doi:10.1039/d3lc00028a), 2023-01-01

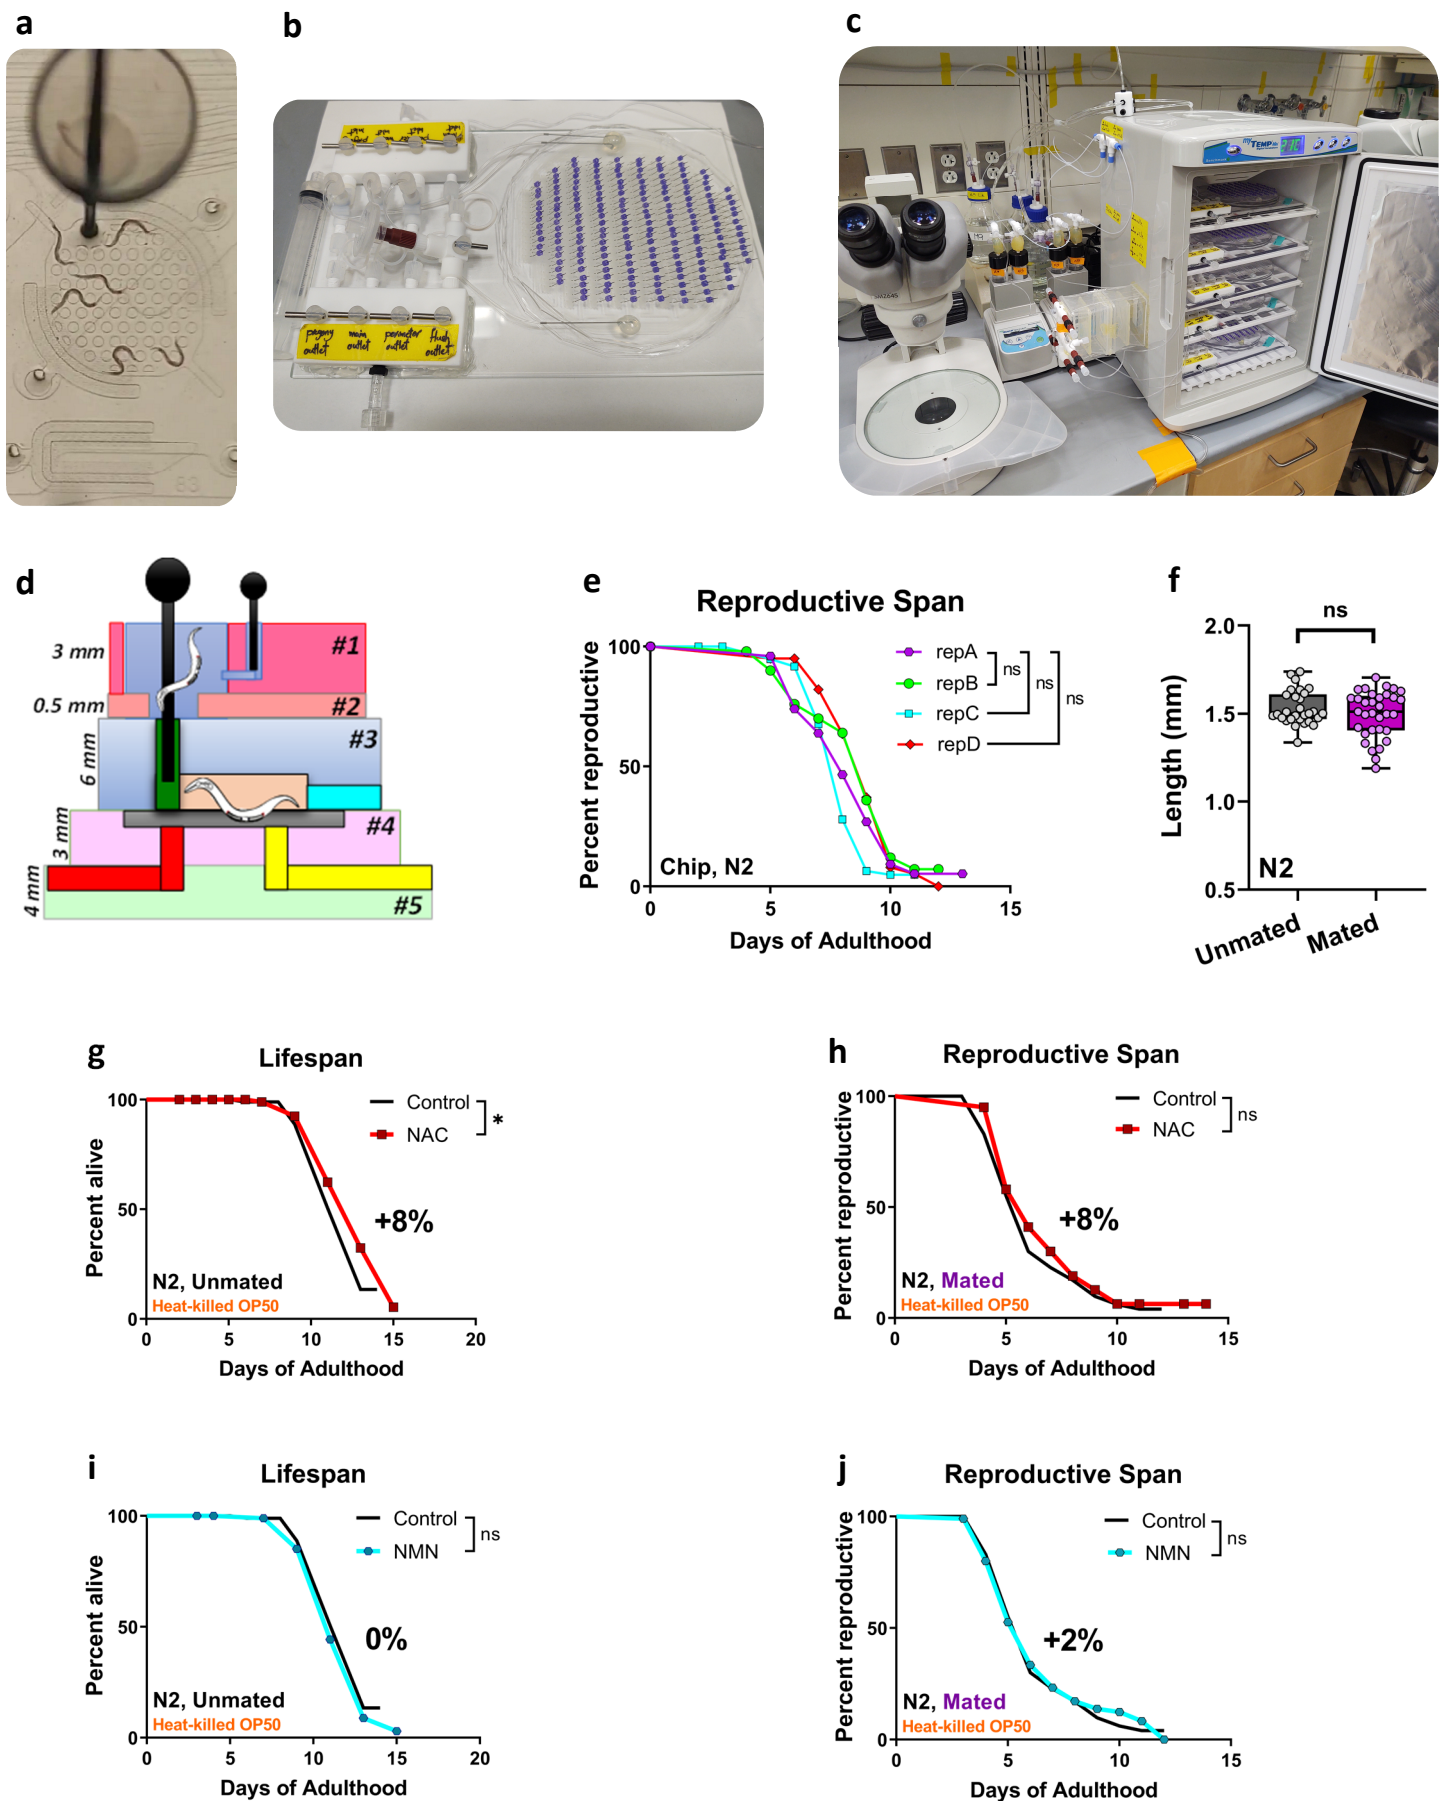

Figure S1

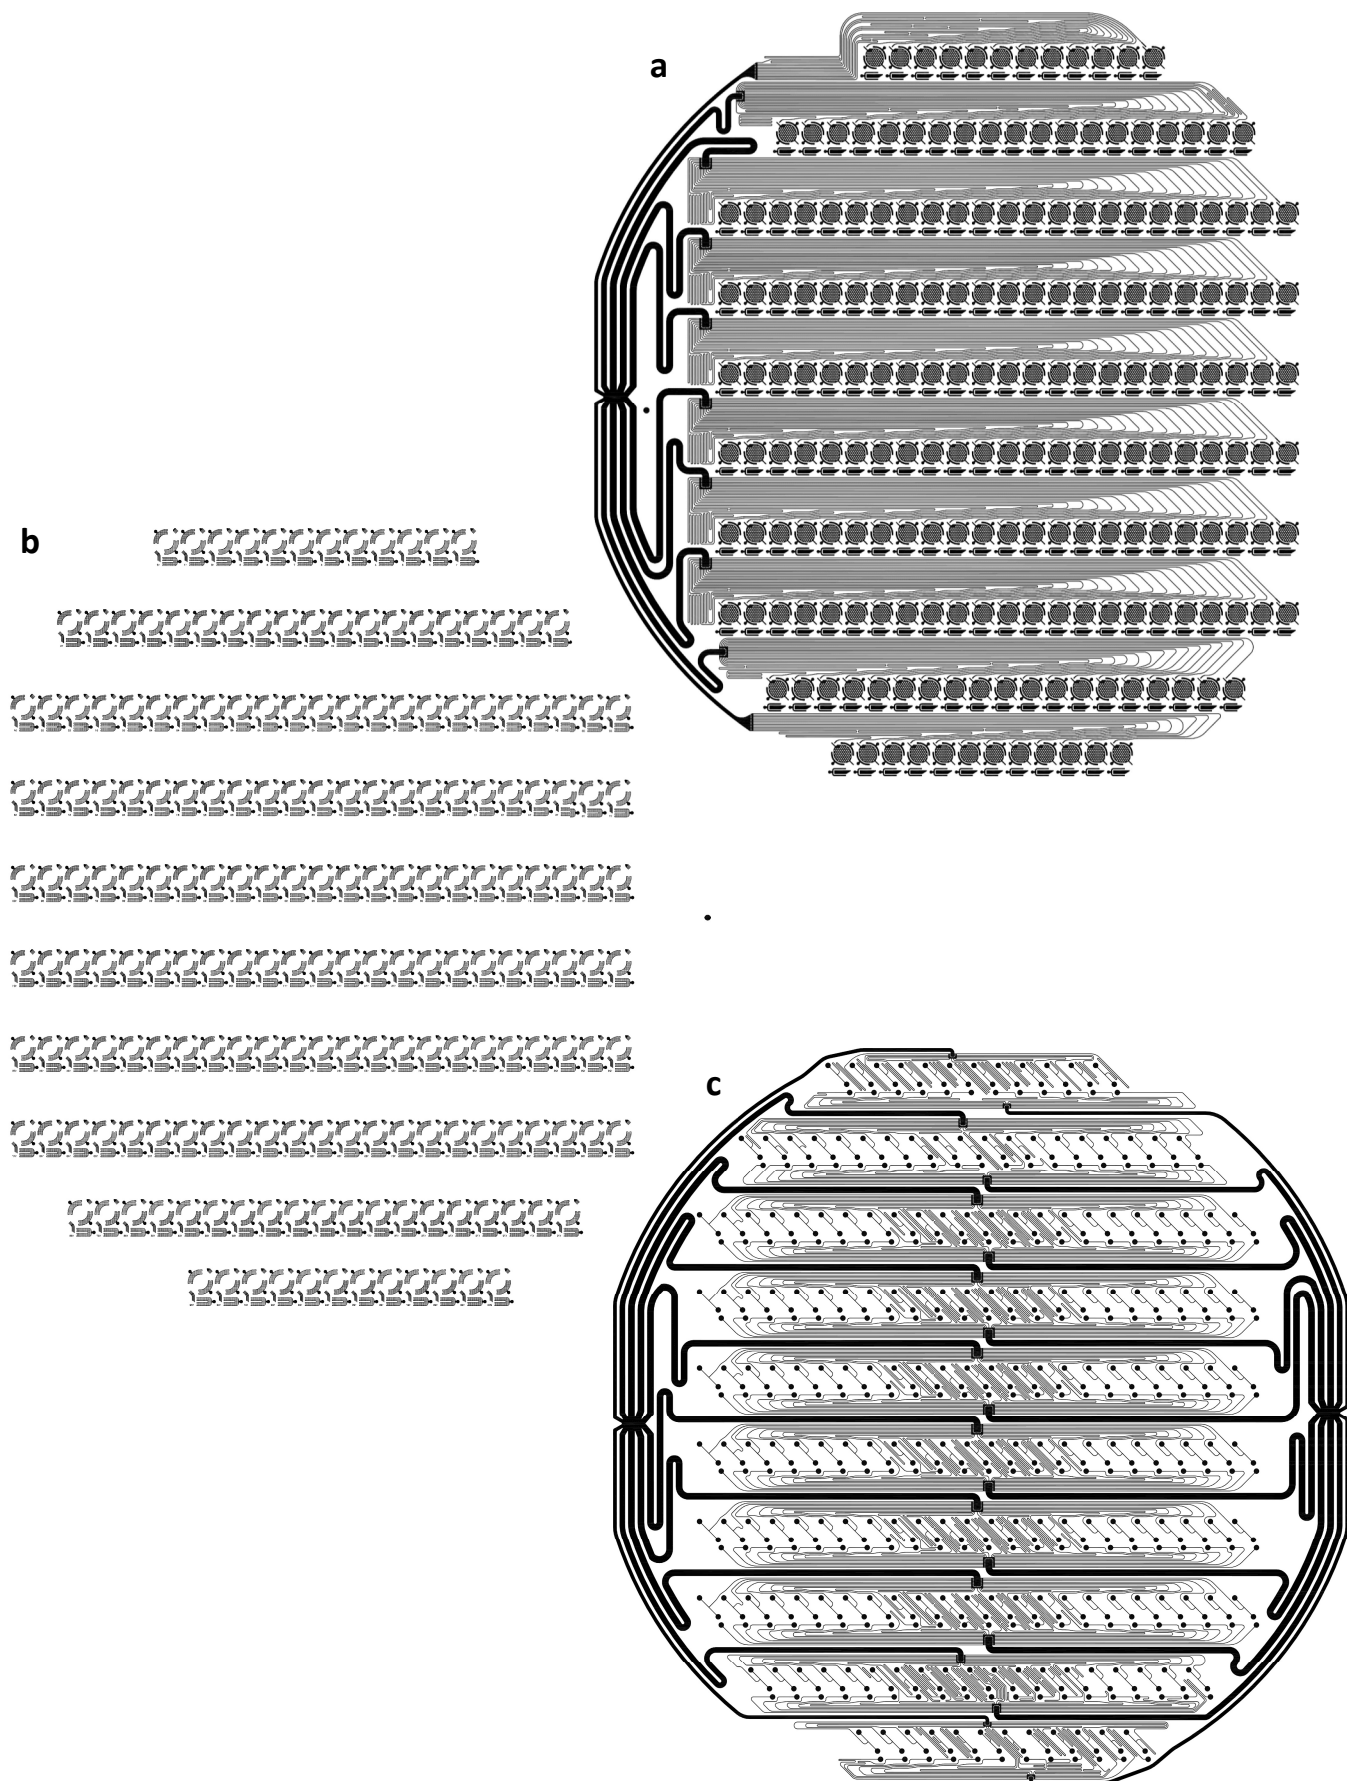

Figure S2

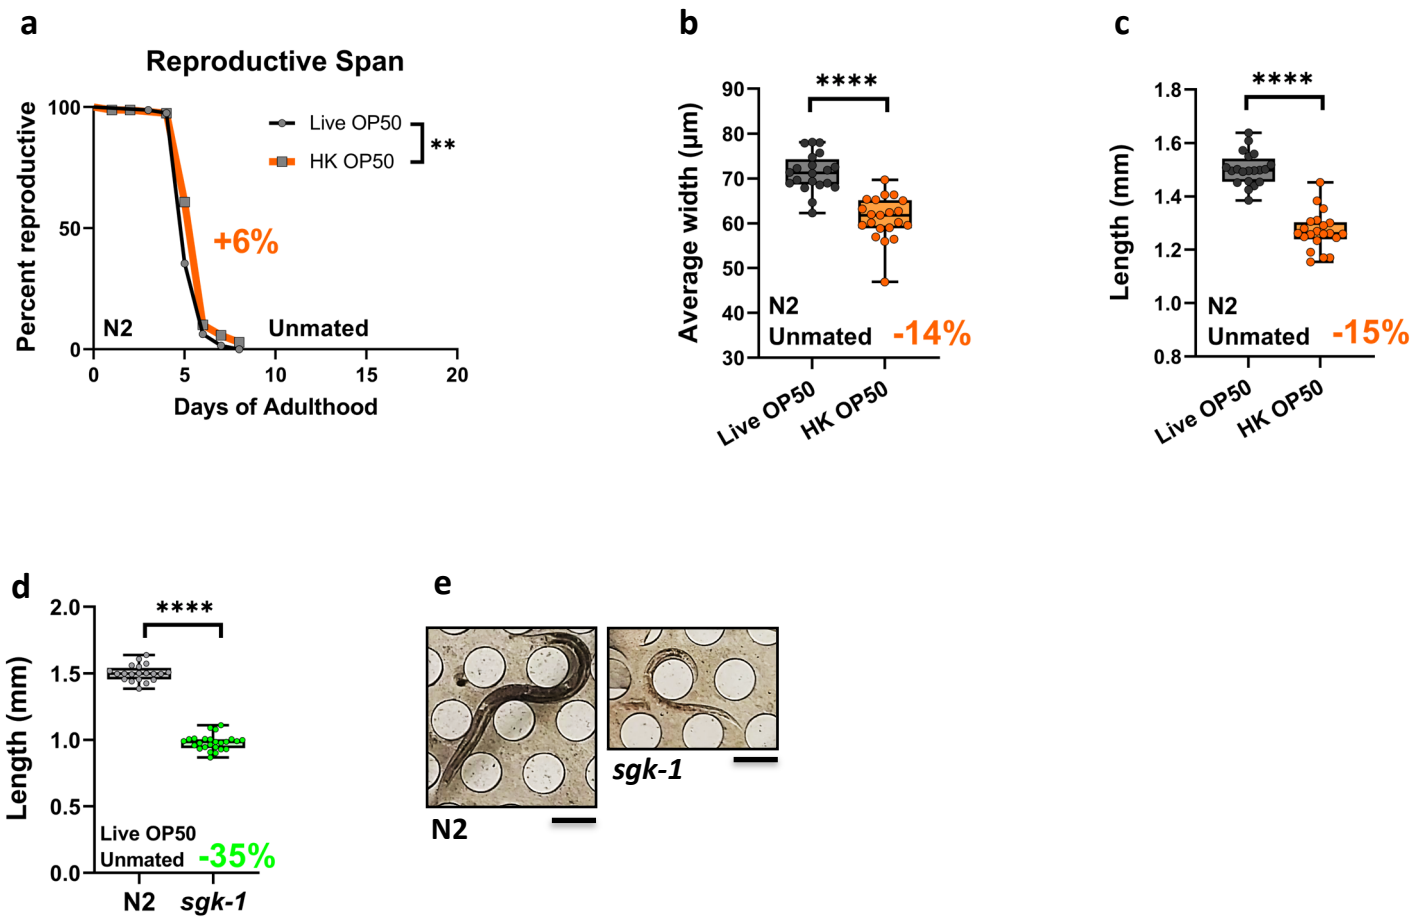

Figure S3

Supplement: d3lc00028a2.pdf [file d3lc00028a2.pdf]
